# Supplementary material for: Spatially targeting and regulating tumor-associated macrophages using a raspberry-like micellar system sensitizes pancreatic cancer chemoimmunotherapy
Source: Royal Society of Chemistry journal article supplement (doi:10.1039/d2nr03053e), 2022-01-01
Supplement: d2nr03053e1.pdf [file d2nr03053e1.pdf]

## Supporting Information

### **Spatially targeting and regulation of tumor-associated macrophages by raspberry-like micellar system sensitizes pancreatic cancer chemoimmunotherapy**

*Ting Li*<sup>a</sup>, *Dong Chen*<sup>a</sup>, *Houqin Liu*<sup>a</sup>, *Yuan Tao*<sup>a</sup>, *Xuan He*<sup>a</sup>, *Shuya Zang*<sup>a</sup>, *Jiaxin Li*<sup>a</sup>, *Ling Zhang*<sup>c</sup>, *Man Li*<sup>a</sup>, *Ji Liu*<sup>b\*</sup> and *Qin He*<sup>a\*</sup>

*a: Key Laboratory of Drug-Targeting and Drug Delivery System of the Education Ministry and Sichuan Province, Sichuan Engineering Laboratory for Plant-Sourced Drug and Sichuan Research Center for Drug Precision Industrial Technology, West China School of Pharmacy, Med-X Center for Materials, Sichuan University, Chengdu 610041, China*

*b: West China School of Basic Medical Sciences and Forensic Medicine, Sichuan University, No. 17, Block 3, Southern Renmin Road, Chengdu 610041, China*

*c: College of Polymer Science and Engineering, Sichuan university, Chengdu 610065, China.*

*\* Corresponding author.*

*Ji Liu, E-mail: [liuji6103@163.com](mailto:liuji6103@163.com)*

*Qin He, E-mail: [qinhe@scu.edu.cn](mailto:qinhe@scu.edu.cn); Fax: +86-28-85502532; Tel: +86-28-85502532*

---

## Supplementary Methods:

### 1. Preparation of Cy3-PCL-PEG and Cy5-DGL-PEG-PCL

PCL-PEG-COOH and Cy3-NH<sub>2</sub> were linked by an amide bond. Briefly, PCL-PEG-COOH, EDC and NHS were dissolved in dried DMSO in the molecular ratio of 1:1.5:1.5 and reacted at 30°C, and the one ratio of Cy3-NHS was added and reacted for 24 h. The product was obtained by dialysis and lyophilization. PCL-PEG-PEP-DGL and Cy5-NHS were mixed in PBS (pH 8.4) for 4 h, and the production was obtained by dialysis and lyophilization.

### 2. Preparation of Cy5 labeled D@PP

2.3 mg PCL-PEG-PEP-DGL and 2 mg PCL-PEG-OCH<sub>3</sub> were mixed in DMSO and injected into PBS (pH 8.4) under stirring, then 20 µL Cy5-NHS (5 mg/mL dissolved in DMSO) were added and continued stirring for 4 h, followed by dialysis in PBS (pH 7.4) for 24 h. The solution was concentrated by ultrafiltration. Cy5-DGL was synthesized accordingly.

### 3. Preparation of DiD encapsulated D@PP

1 mL DiD (100 µg/mL), 2.3 mg PCL-PEG-PEP-DGL and 2 mg PCL-PEG-OCH<sub>3</sub> were dissolved in DMSO and mixed, then the solution was slowly injected into warmed PBS under stirring. DMSO was removed by dialysis and un-encapsulated DiD was removed by filtration with 0.8 µm water filter membrane. The solution was concentrated by ultrafiltration. For the preparation of DiD/PCL-PEG, PCL-PEG-PEP-DGL was replaced by PCL-PEG-COOH. D@PP/DiD was incubated with excess papain for 1 h at 37°C.

### 4. Preparation of Cy5 and RhoB labeled D@PP or D-PP

Cy5 and RhoB dual labeled Cy5-D@PP/RhoB and Cy5-D-PP/RhoB was prepared by DMSO injection. RhoB was dissolved in DMSO and mixed with D@PP or D-PP (dissolved in DMSO). This solution was injected into warmed PBS (pH 8.4) and Cy5-NHS was added. After stirring for 4 h, the solution was dialysis in PBS for 24 h and filtrated with 0.8 µm water filter. Then, the solution was concentrated by ultrafiltration.

Table 1. Molecular weight of PCL-PEG measured by GPC.

| Polymer                  | Weight average molecular weight (Mw) | Number average molecular Weight (Mn) | Polydispersity index (Mw/Mn) |
|--------------------------|--------------------------------------|--------------------------------------|------------------------------|
| PCL-PEG-OCH <sub>3</sub> | 11411                                | 9072                                 | 1.258                        |
| PCL-PEG-COOH             | 11070                                | 8882                                 | 1.246                        |
| PCL-PEG-PEP              | 13051                                | 10227                                | 1.860                        |

Table 2. Particle size, PDI, potential and loading content of GEM and Wtmn of different nanoparticles (n = 3, mean ± SD).

| Drug loaded nanoparticles | Size(nm)     | PDI        | Zeta potential(mV) | GEM (%) | Wtmn (%) |
|---------------------------|--------------|------------|--------------------|---------|----------|
| DGL/GEM                   | 26.85±3.1    | 0.30±0.01  | 28.33±3.00         | 11.3    | /        |
| GD@PP                     | 137.60 ±8.27 | 0.22±0.02  | 8.56±0.38          | 3.85    | /        |
| D@PP/Wtmn                 | 102.32±10.86 | 0.291±0.01 | 16.76±0.51         | /       | 1.51     |
| GD-PP/Wtmn                | 103.1±2.14   | 0.245±0.01 | 4.87±0.64          | 3.77    | 1.50     |
| GD@PP/Wtmn                | 107.93 ±4.25 | 0.225±0.03 | 4.91±0.45          | 3.76    | 1.50     |

## Supporting Figures

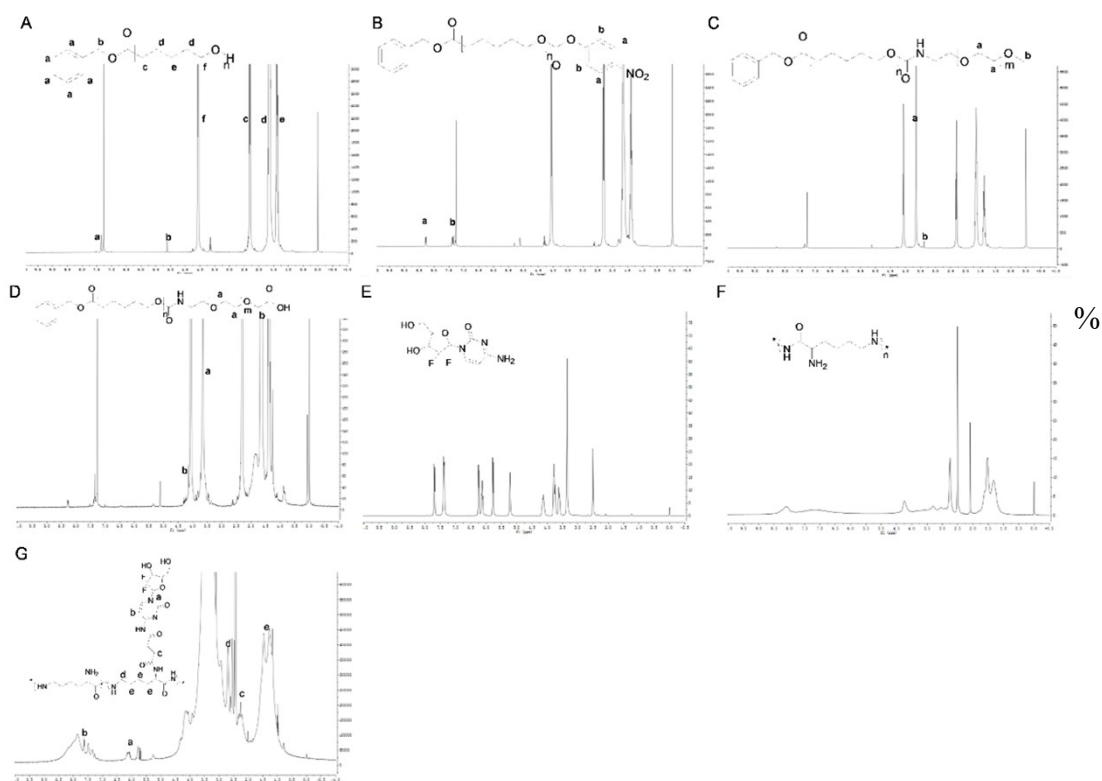

Figure S1<sup>1</sup>H-NMR spectrum of PCL(A), PCL-NPC(B), PCL-PEG-OCH<sub>3</sub>(C), PCL-PEG-COOH(D), GEM (E), DGL (F), GEM-DGL (G). PCL, PCL-NPC, PCL-PEG-OCH<sub>3</sub> and PCL-PEG-COOH were dissolved in CDCl<sub>3</sub>. Other substances were dissolved in DMSO-d<sub>6</sub>.

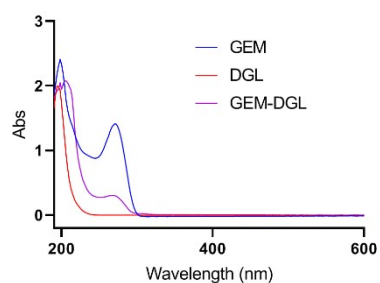

Figure S2 UV spectrum of GEM, DGL and GEM-DGL.

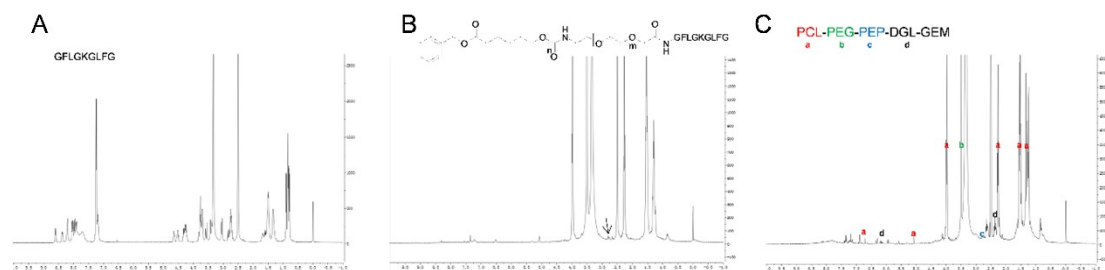

Figure S3 <sup>1</sup>H-NMR of substrate peptide GFLGKGLFG (A), PCL-PEG-PEP (B) and PCL-PEG-PEP-DGL-GEM (C) dissolved in DMSO-d<sub>6</sub>.

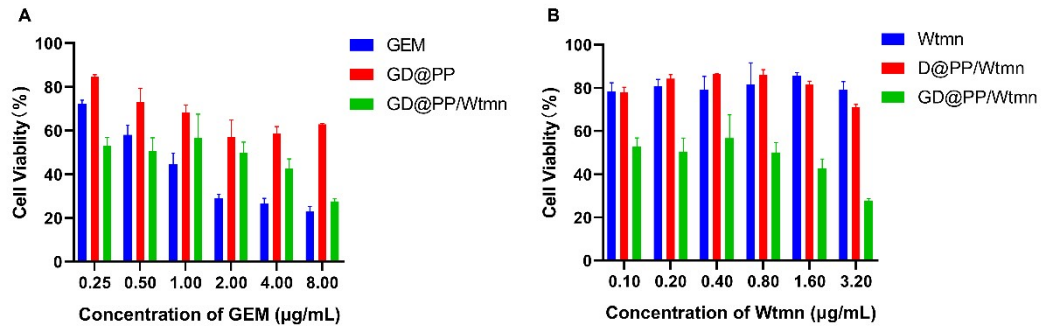

Figure S6 Cell viability of Pan 02 cells after treated with GEM or Wtmn loaded preparations for 48 h (n = 3, mean ± SD).

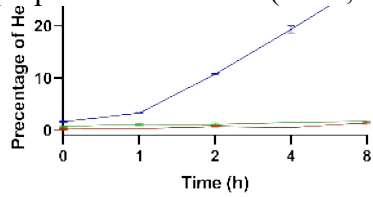

Figure S5 Hemolysis rate of blank carriers (n = 3, mean ± SD).

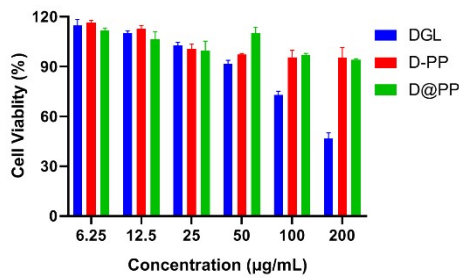

Figure S7 Cytotoxicity of blank carriers on Pan 02 (A) and RAW264.7 cells (B) (n = 3, mean ± SD).

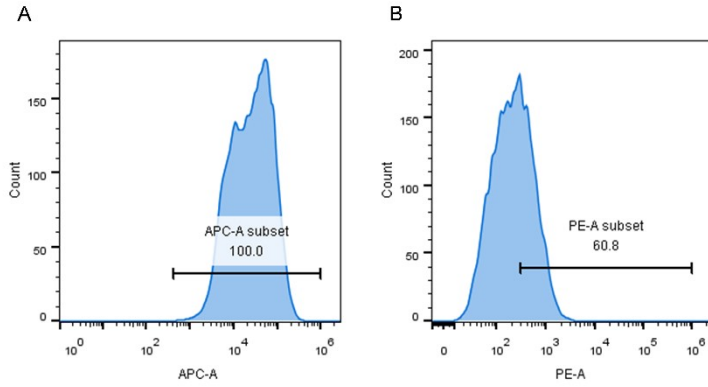

Figure S8 Expression of F4/80 and CD206 in M2 TAMs.

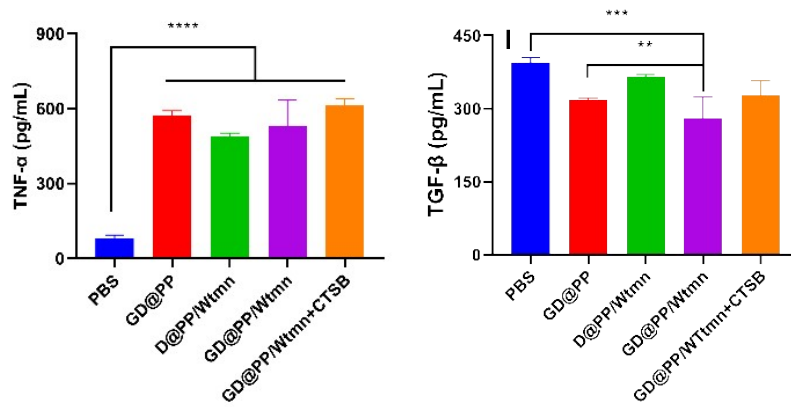

Figure S9 The level of TNF- $\alpha$  and TGF- $\beta$  in the lower chamber analyzed by ELISA. (n=3, means  $\pm$  SD).

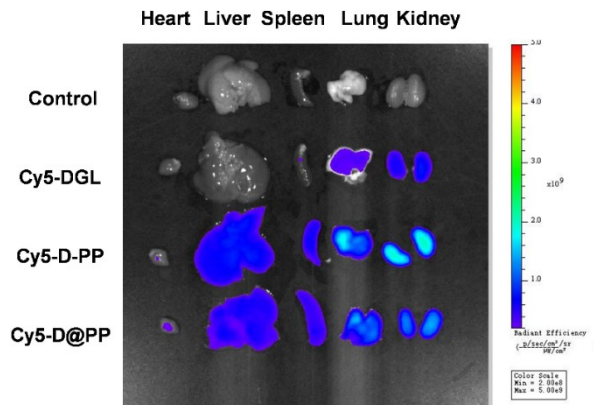

Figure S10 Ex vivo imaging of major organs after intravenous injection of Cy5 labelled nanoparticles.

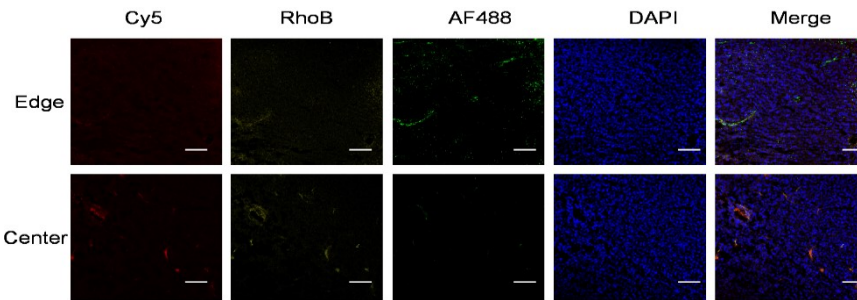

Figure S11 Fluorescence distribution of Cy5-D-PP/RhoB within tumor sections in edge and deep region of tumor. Red: Cy5-DGL, Yellow: PCL-PEG/RhoB, Green: AF488-CD31, Blue: DAPI. Scale bar = 100  $\mu$ m.

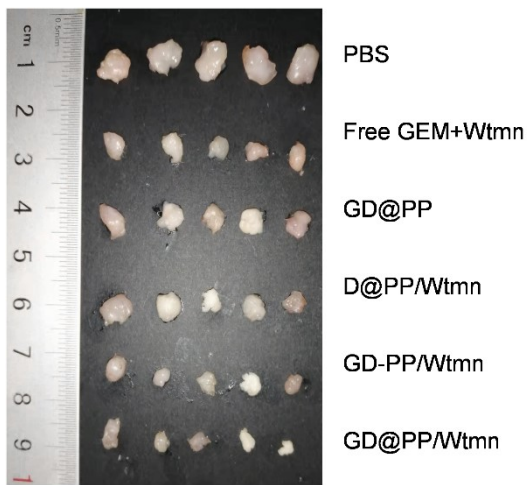

Figure S12 Images of tumors after treatment in each group.

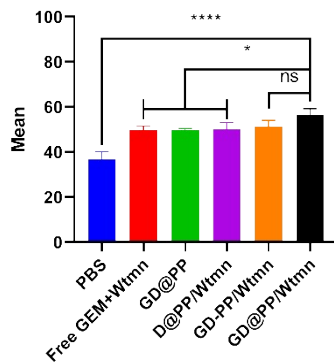

Figure S13 Semi-quantified results of TUNEL staining images of tumors by Image J.

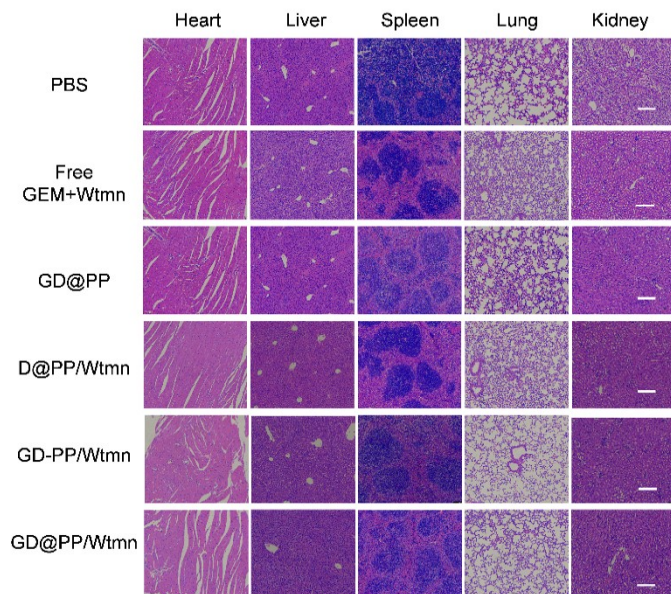

Figure S14 H&E staining images of major organs, scale bar = 200  $\mu$ m

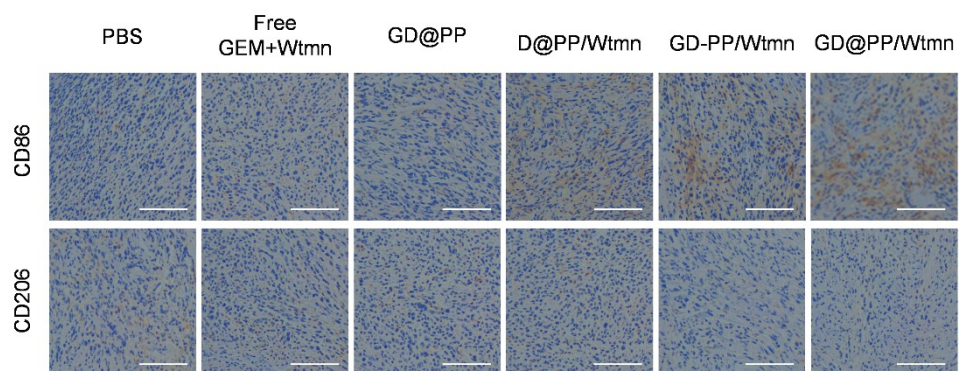

Figure S15 Immunohistochemical staining of CD86 and CD206 of tumor sections after treatment. Scale bar = 100  $\mu$ m.
